# Supplementary material for: Dinuclear Ag(i) metallamacrocycles of bis-N-heterocyclic carbenes bridged by calixarene fragments: synthesis, structure and chemosensing behavior
Source: Royal Society of Chemistry journal article supplement (doi:10.1039/c3ce40918j), 2013-01-01
Supplement: c3ce40918j.pdf [file c3ce40918j.pdf]

## *Supporting Information for*

# Dinuclear Ag(I) Metallamacrocycles of Bis-N-Heterocyclic Carbenes Bridged by Calixarene Fragments: Synthesis, Structure and Chemosensing Behavior

Cai-Xia Lin,<sup>b</sup> Xiao-Fei Kong,<sup>a</sup> Qing-Shan Li,<sup>a</sup> Zheng-Zhi Zhang,<sup>\*a</sup> Yao-Feng Yuan <sup>\*b</sup> and Feng-Bo Xu <sup>\*a</sup>

### *Table of Contents*

|                                                                                                                       |                    |
|-----------------------------------------------------------------------------------------------------------------------|--------------------|
| <u>Table S1. C-H...F hydrogen-bonds in the crystal structures of complexes <b>6a-f</b>.</u>                           | <u>Page S1-2</u>   |
| <u>Table S2. Distances of intermolecular <math>\pi</math>-<math>\pi</math> interactions for complexes <b>6c-f</b></u> | <u>Page S2</u>     |
| <u>Figure S1-S14. <sup>1</sup>H NMR spectra of complexes <b>6a-f</b> and ligands <b>5a-f</b>.</u>                     | <u>Page S3-9</u>   |
| <u>Figure S15, Table S3. DOSY Experiment of complex <b>6d</b></u>                                                     | <u>Page S10-11</u> |
| <u>Figure S16-S17. TGA, DSC and Variation temperature <sup>1</sup>H NMR of complex <b>6c</b></u>                      | <u>Page S12</u>    |
| <u>Figure S18. Stern-Volmer plot of <b>6d</b> and <b>BQ</b>.</u>                                                      | <u>Page S13</u>    |
| <u>Figure S19. <sup>1</sup>H NMR spectrum of a 1:5 solution of <b>6d</b> and <b>BQ</b>.</u>                           | <u>Page S13</u>    |
| <u>Table S4, S5. Job Plot of <b>6d</b> and <b>BQ</b>.</u>                                                             | <u>Page S14</u>    |
| <u>Figure S20. Fluorescence titration of complex <b>6e</b> with C<sub>60</sub>.</u>                                   | <u>Page S15</u>    |
| <u>Figure S21. Fluorescence titration of complex <b>6e</b> with C<sub>70</sub>.</u>                                   | <u>Page S16</u>    |
| <u>Figure S22. Fluorescence titration of complex <b>6f</b> with C<sub>60</sub>.</u>                                   | <u>Page S17</u>    |
| <u>Figure S23. Fluorescence titration of complex <b>6f</b> with C<sub>70</sub>.</u>                                   | <u>Page S18</u>    |

**Table S1.** C-H...F hydrogen-bonds in the crystal structures of complexes **6a-f**. (Å, °)

|           | H-bond               | D-H  | H...A | D...A     | D-H...A | Symmetry codes             |
|-----------|----------------------|------|-------|-----------|---------|----------------------------|
| <b>6a</b> | C(1)-H(1B)...F(4)    | 0.98 | 2.41  | 3.315(3)  | 154     | 0.5 + x, -0.5 + y, 0.5 - z |
|           | C(1)-H(1C)...F(2)    | 0.98 | 2.36  | 3.237(3)  | 148     | 1 - x, -y, z               |
| <b>6b</b> | C(2)-H(2)...F(4)     | 0.95 | 2.52  | 3.25(2)   | 133     | 0.5 - x, -0.5 + y, 0.5 - z |
|           | C(7)-H(7)...F(10)    | 0.95 | 2.45  | 3.39(3)   | 170     | x, y, -1 + z               |
|           | C(9)-H(9)...F(3)     | 0.95 | 2.55  | 3.480(19) | 168     | -                          |
|           | C(19)-H(19)...F(9)   | 0.95 | 2.39  | 3.18(4)   | 140     | 0.5 - x, -0.5 + y, 1.5 - z |
|           | C(22)-H(22B)...F(7)  | 0.98 | 2.37  | 3.23(2)   | 145     | 1 - x, -y, 1 - z           |
|           | C(22)-H(22C)...F(12) | 0.98 | 2.39  | 3.09(2)   | 127     | x, -1 + y, -1 + z          |
|           | C(36)-H(36A)...F(1)  | 0.98 | 2.49  | 3.44(2)   | 162     | 0.5 + x, 0.5 - y, -0.5 + z |
|           | C(37)-H(37C)...F(8)  | 0.98 | 2.51  | 3.47(3)   | 165     | 0.5 + x, 0.5 - y, -0.5 + z |
| <b>6c</b> | C(23)-H(23C)...F(4)  | 0.98 | 2.27  | 3.119(4)  | 144     | 1 - x, 1 - y, 1 - z        |
|           | C(40)-H(40A)...F(1)  | 0.98 | 2.28  | 3.173(6)  | 151     | 1 - x, 1 - y, -z           |
|           | C(28)-H(28A)...N(5)  | 0.99 | 2.62  | 3.475(10) | 145     | -x, 1 - y, 1 - z           |
|           | C(40)-H(40B)...O(1)  | 0.98 | 2.54  | 3.44(2)   | 133     | -                          |
| <b>6d</b> | C(7)-H(7)...F(4)     | 0.95 | 2.50  | 3.398(9)  | 157     | 1 + x, y, z                |
|           | C(17)-H(17)...F(5)   | 0.95 | 2.55  | 3.320(11) | 139     | 0.5 + x, 0.5 - y, -0.5 + z |
|           | C(19)-H(19A)...F(6)  | 0.99 | 2.37  | 3.343(9)  | 168     | 0.5 + x, 0.5 - y, -0.5 + z |
|           | C(29)-H(29)...N(6)   | 0.95 | 2.56  | 3.418(11) | 150     | 1.5 - x, 0.5 - y, 1 - z    |
|           | C(40)-H(40)...F(1)   | 0.95 | 2.39  | 3.337(10) | 174     | 1 - x, -y, 1 - z           |
| <b>6e</b> | C(3)-H(3)...F(3)     | 0.95 | 2.48  | 3.353(9)  | 152     | -                          |
|           | C(11)-H(11)...F(6)   | 0.95 | 2.53  | 3.428(7)  | 157     | 1 - x, -y, 1 - z           |
|           | C(17)-H(17)...F(8)   | 0.95 | 2.55  | 3.292(6)  | 135     | 1 - x, -y, 1 - z           |
|           | C(27)-H(27B)...F(12) | 0.98 | 2.24  | 3.076(18) | 143     | x, y, -1 + z               |
|           | C(28)-H(28A)...F(11) | 0.99 | 2.27  | 3.234(14) | 163     | x, y, -1 + z               |
|           | C(36)-H(36A)...F(11) | 0.98 | 2.54  | 3.492(12) | 165     | x, y, -1 + z               |
|           | C(39)-H(39)...N(10)  | 0.95 | 2.23  | 3.112(12) | 155     | 1 - x, -y, -z              |
|           | C(66)-H(66)...F(9)   | 0.95 | 2.53  | 3.408(6)  | 154     | 1 + x, y, -1 + z           |

Continued

| H-bond                       | D-H  | H...A | D...A     | D-H...A | Symmetry codes      |
|------------------------------|------|-------|-----------|---------|---------------------|
| C(71)-H(71)···F(4)           | 0.95 | 2.53  | 3.450(6)  | 164     | 1 - x, 1 - y, -z    |
| C(81)-H(81C)···F(10)         | 0.98 | 2.52  | 3.452(15) | 159     | x, y, -1 + z        |
| C(82)-H(82C)···F(1)          | 0.98 | 2.51  | 3.457(8)  | 163     | x, y, -1 + z        |
| C(94)-H(94)···F(1)           | 0.95 | 2.43  | 3.224(7)  | 140     | 1 - x, 1 - y, 1 - z |
| C(96)-H(96B)···F(1)          | 0.99 | 2.54  | 3.337(7)  | 138     | 1 - x, 1 - y, 1 - z |
| C(96)-H(96B)···F(4)          | 0.99 | 2.48  | 3.294(6)  | 139     | 1 - x, 1 - y, 1 - z |
| C(104)-H(104)···F(9)         | 0.95 | 2.35  | 3.286(8)  | 170     | 1 + x, y, z         |
| C(107)-H(107)···F(13)        | 0.95 | 1.99  | 2.87(2)   | 153     | 2 - x, 1 - y, 1 - z |
| C(107)-H(107)···F(14)        | 0.95 | 2.26  | 2.946(16) | 129     | 2 - x, 1 - y, 1 - z |
| <b>6f</b> C(11)-H(11)···F(6) | 0.95 | 2.44  | 3.383(6)  | 172     | -                   |
| C(15)-H(15A)···F(1)          | 0.99 | 2.36  | 3.327(5)  | 165     | 1 - x, 1 - y, 1 - z |
| C(63)-H(63)···F(1)           | 0.95 | 2.55  | 3.393(4)  | 149     | x, 1 + y, z         |
| C(70)-H(70)···F(4)           | 0.95 | 2.36  | 3.251(6)  | 156     | 2 - x, 1 - y, 1 - z |

**Table S2.** Distances (Å) of intermolecular  $\pi$ - $\pi$  interactions for complexes **6c-f**.

| Compounds | interacted rings | Face-to-Face | Center-to-Center | Symmetry Code           |
|-----------|------------------|--------------|------------------|-------------------------|
| <b>6c</b> | naphthalene      | 3.2915(13)   | 3.820(2)         | 1 - x, -y, 1 - z        |
| <b>6d</b> | anthracene       | 3.367(3)     | 3.955(4)         | 2.5 - x, 0.5 - y, 1 - z |
| <b>6e</b> | anthracene       | 3.4124(16)   | 3.953(3)         | 2 - x, 1 - y, -1 - z    |
| <b>6f</b> | anthracene       | 3.3705(11)   | 3.6135(18)       | 2 - x, 2 - y, 1 - z     |

## $^1\text{H}$ NMR spectra of complexes **6a-f** and ligands **5a-f**

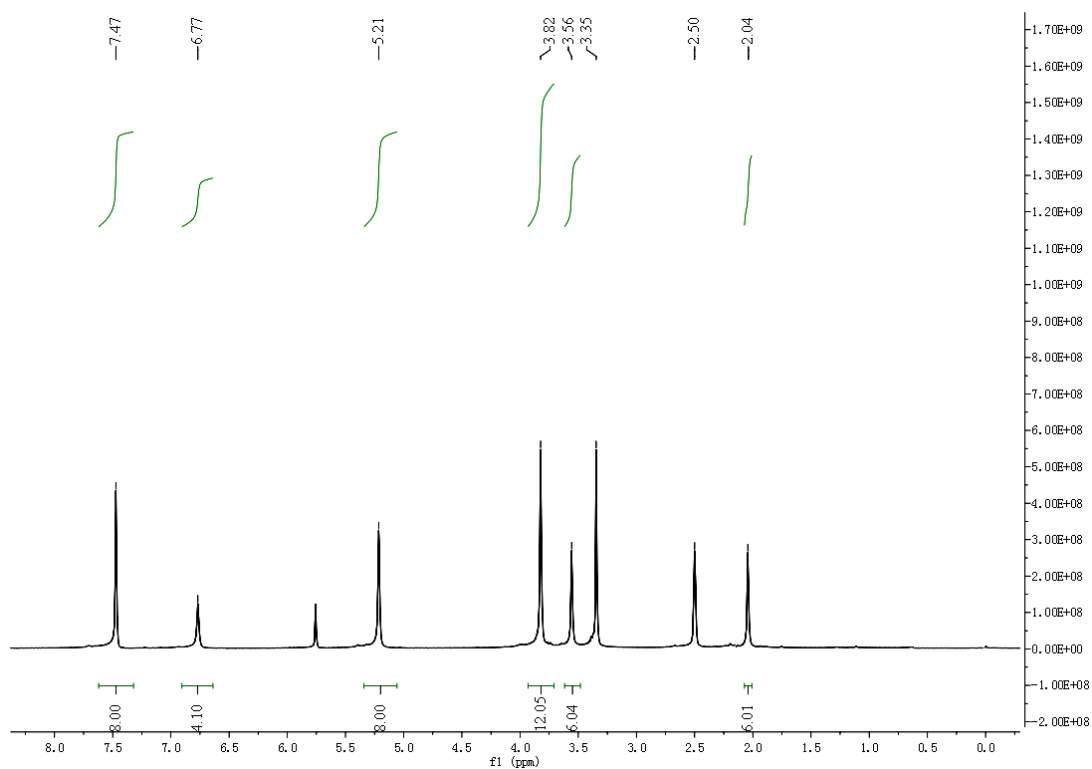

Figure S1.  $^1\text{H}$  NMR spectrum for **6a** (400 MHz,  $\text{DMSO-}d_6$ , 298 K).

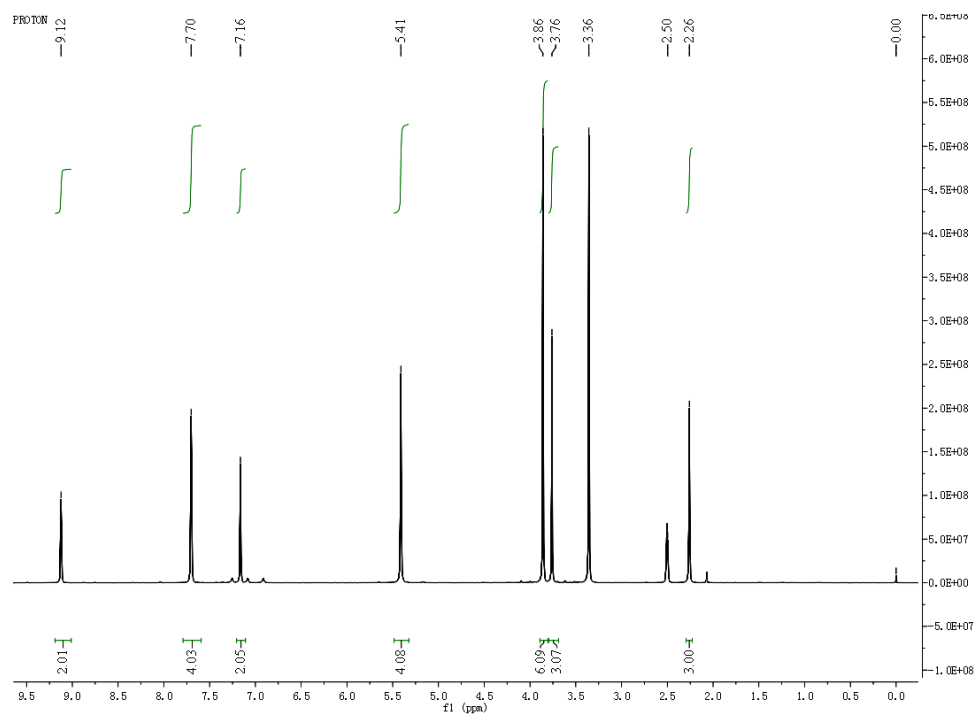

Figure S2.  $^1\text{H}$  NMR spectrum for ligand **5a** (400 MHz,  $\text{DMSO-}d_6$ , 298 K).

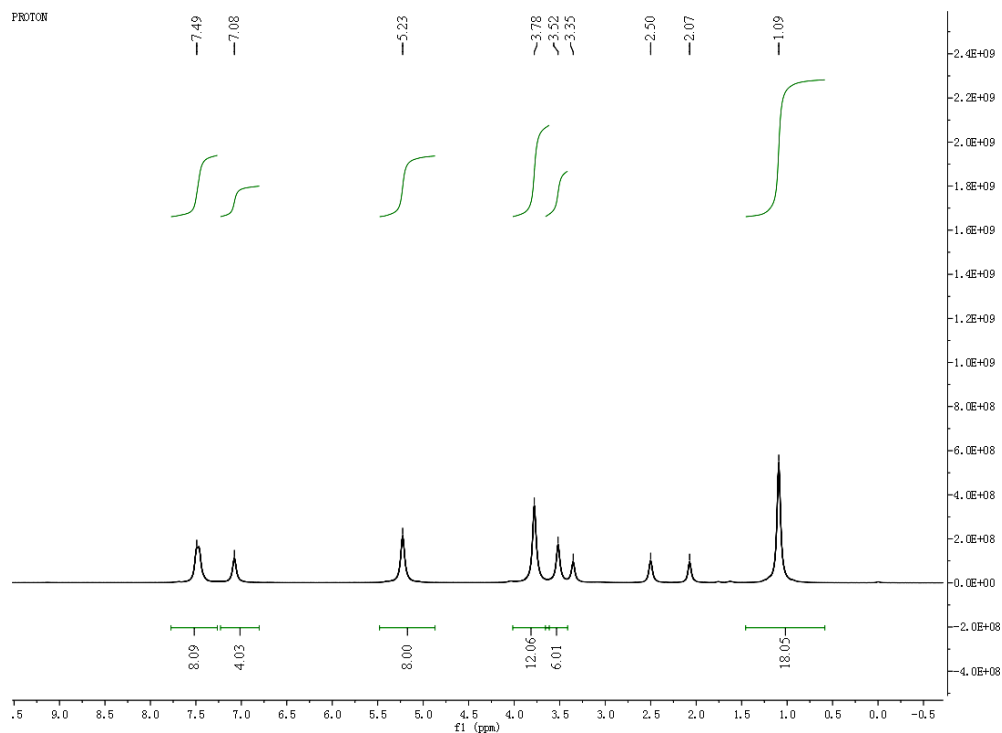

Figure S3. <sup>1</sup>H NMR spectrum for complex **6b** (400 MHz, DMSO-*d*<sub>6</sub>, 298 K).

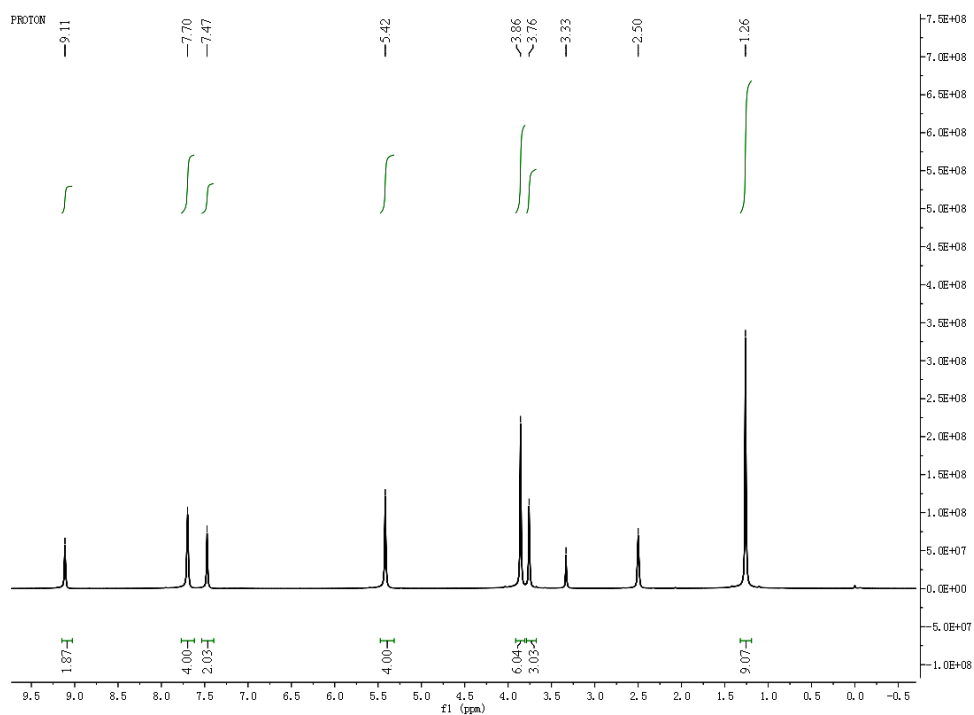

Figure S4. <sup>1</sup>H NMR spectrum for ligand **5b** (400 MHz, DMSO-*d*<sub>6</sub>, 298 K).

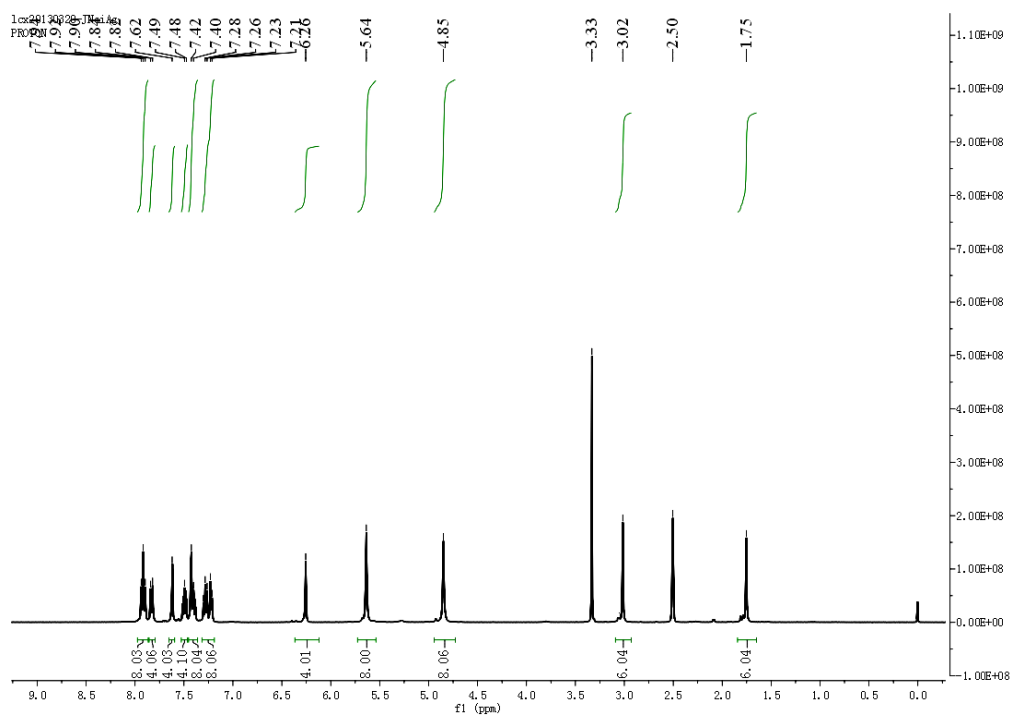

Figure S5.  $^1\text{H}$  NMR spectrum for complex **6c** (400 MHz,  $\text{DMSO-}d_6$ , 298 K).

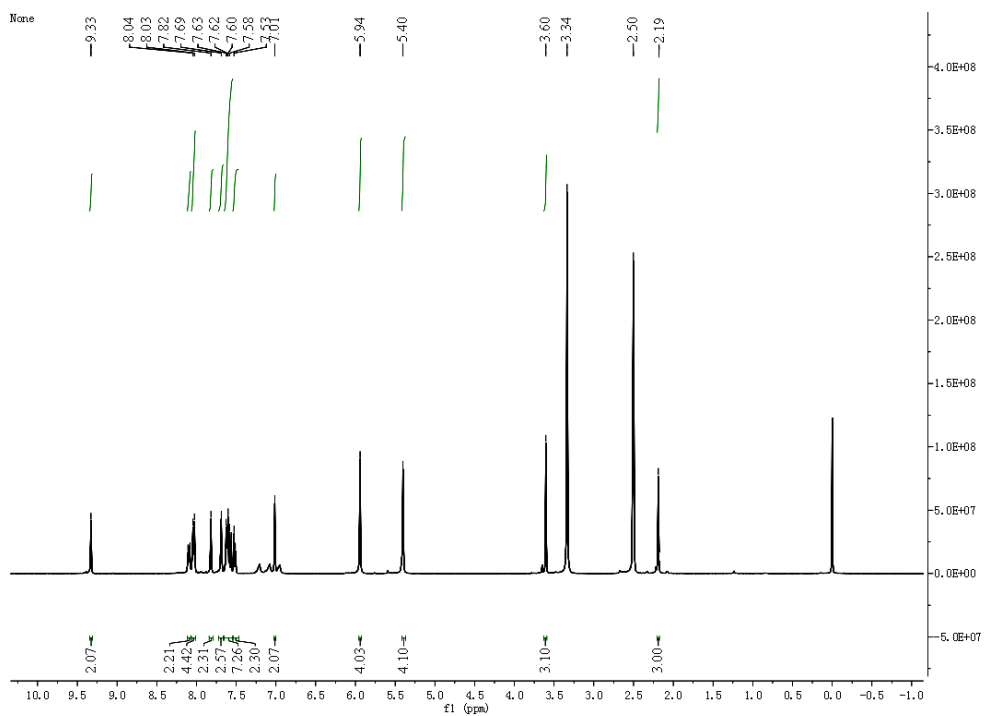

Figure S6.  $^1\text{H}$  NMR spectrum for ligand **5c** (400 MHz,  $\text{DMSO-}d_6$ , 298 K).

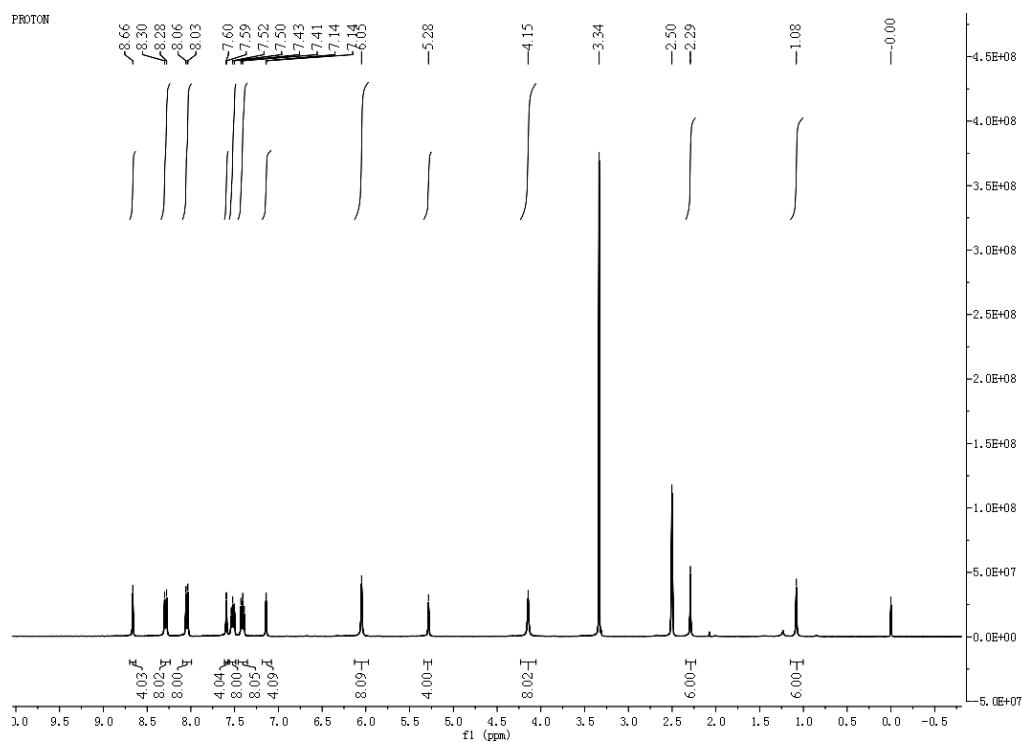

Figure S7.  $^1\text{H}$  NMR spectrum for complex **6d** (400 MHz,  $\text{DMSO-}d_6$ , 298 K).

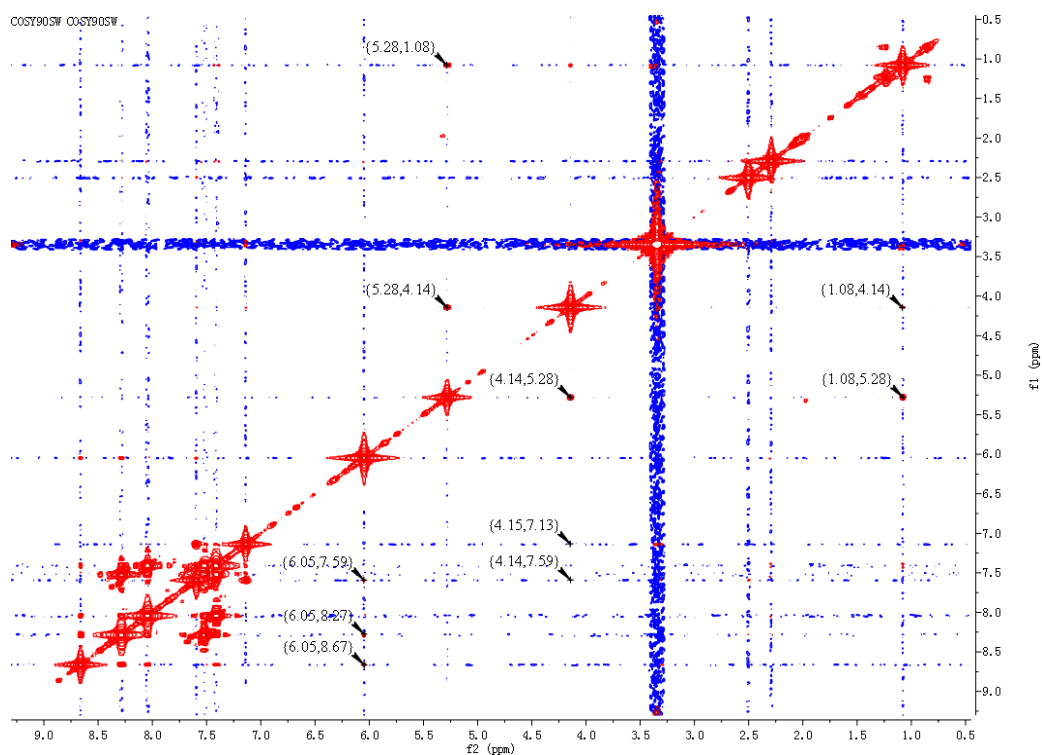

Figure S8. H-H COSY spectrum for complex **6d** (400 MHz,  $\text{DMSO-}d_6$ , 298 K).

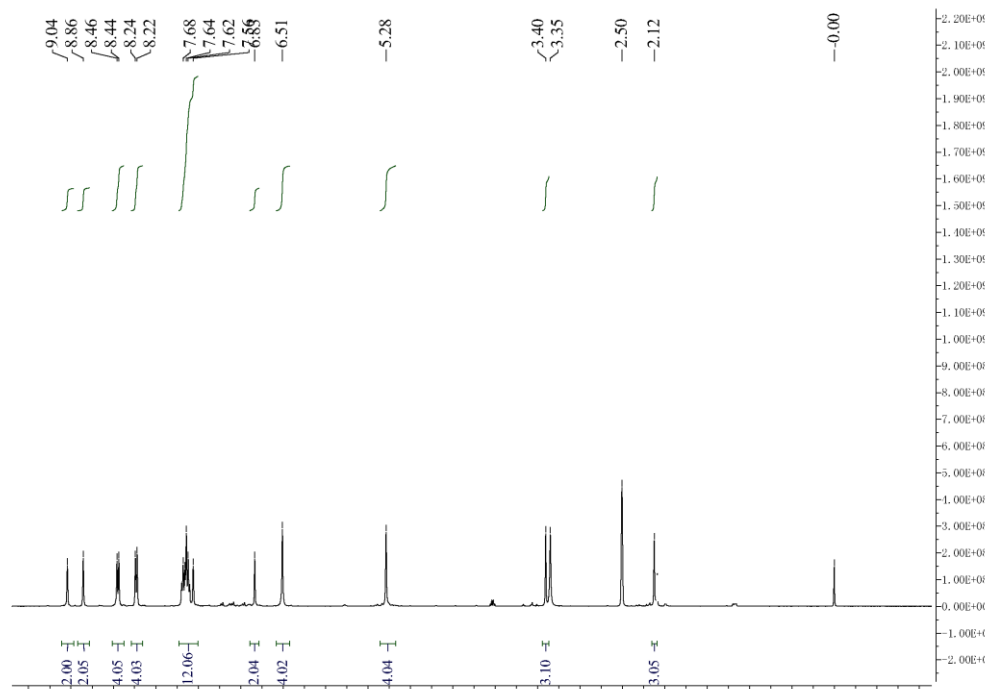

Figure S9. <sup>1</sup>H NMR spectrum for ligand **5d** (400 MHz, DMSO-*d*<sub>6</sub>, 298 K).

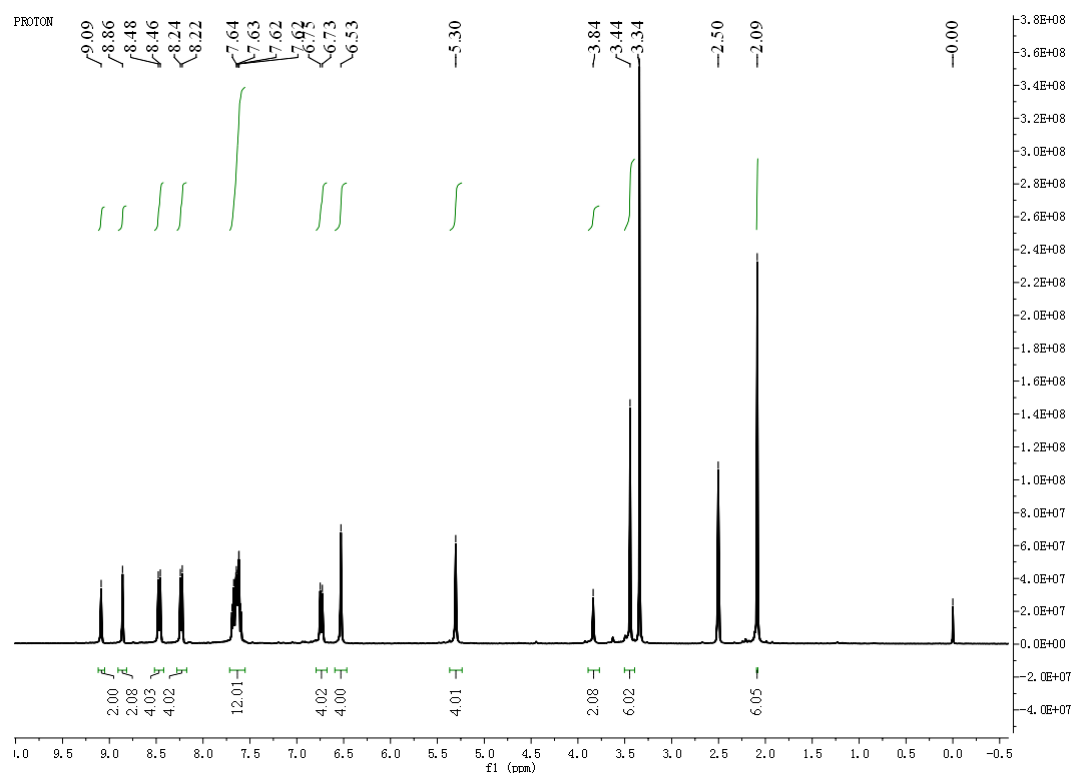

Figure S10. <sup>1</sup>H NMR spectrum for ligand **5e** (400 MHz, DMSO-*d*<sub>6</sub>, 298 K).



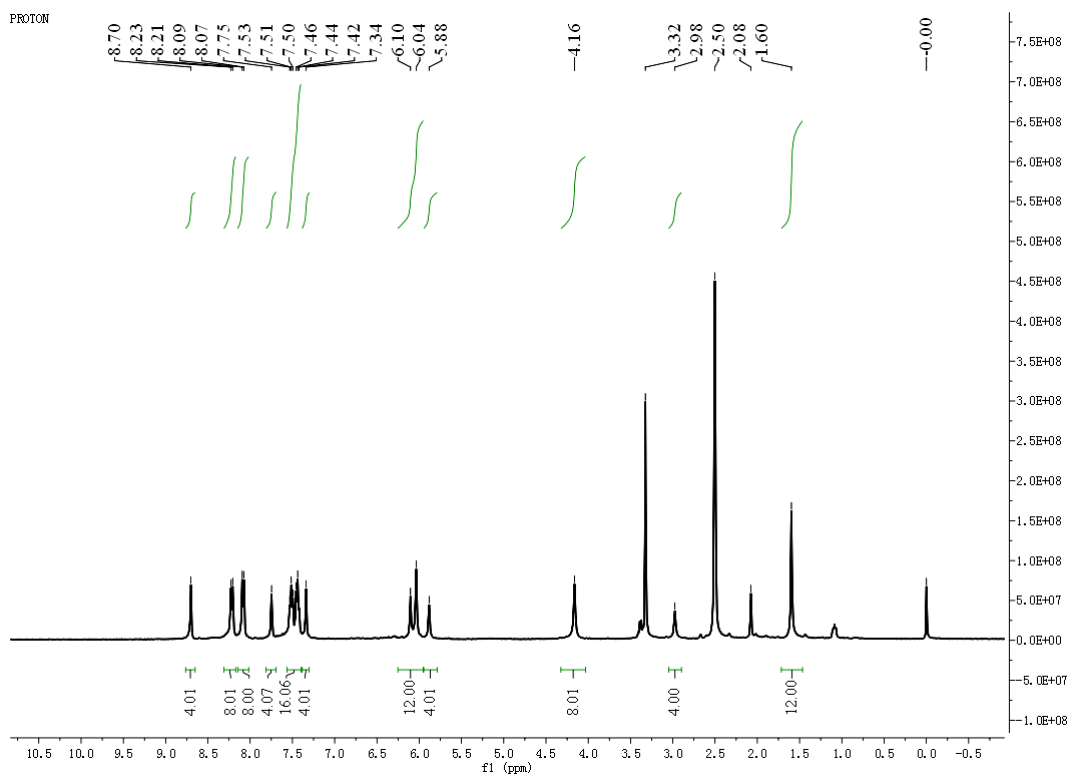

Figure S11.  $^1\text{H}$  NMR spectrum for complex **6e** (400 MHz,  $\text{DMSO-}d_6$ , 298 K).

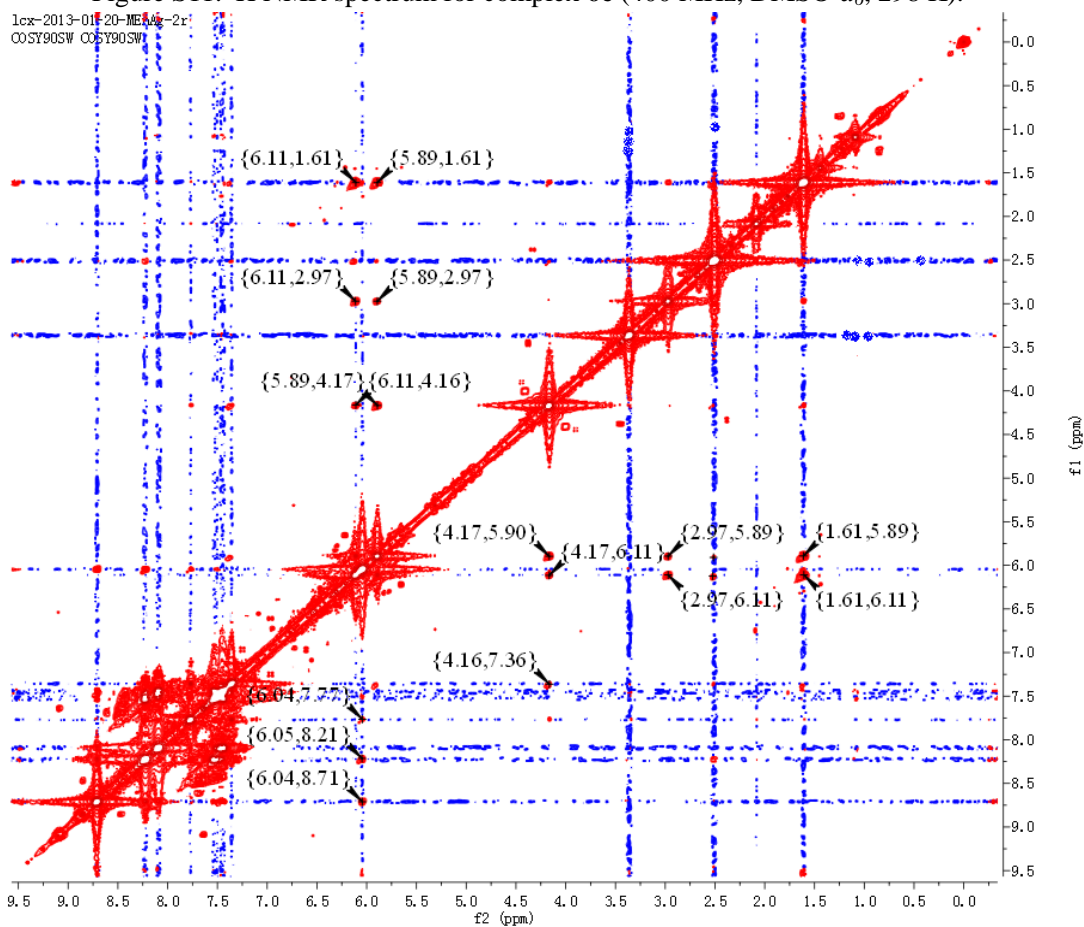

Figure S12. H-H COSY spectrum for complex **6e** (400 MHz,  $\text{DMSO-}d_6$ , 298 K).

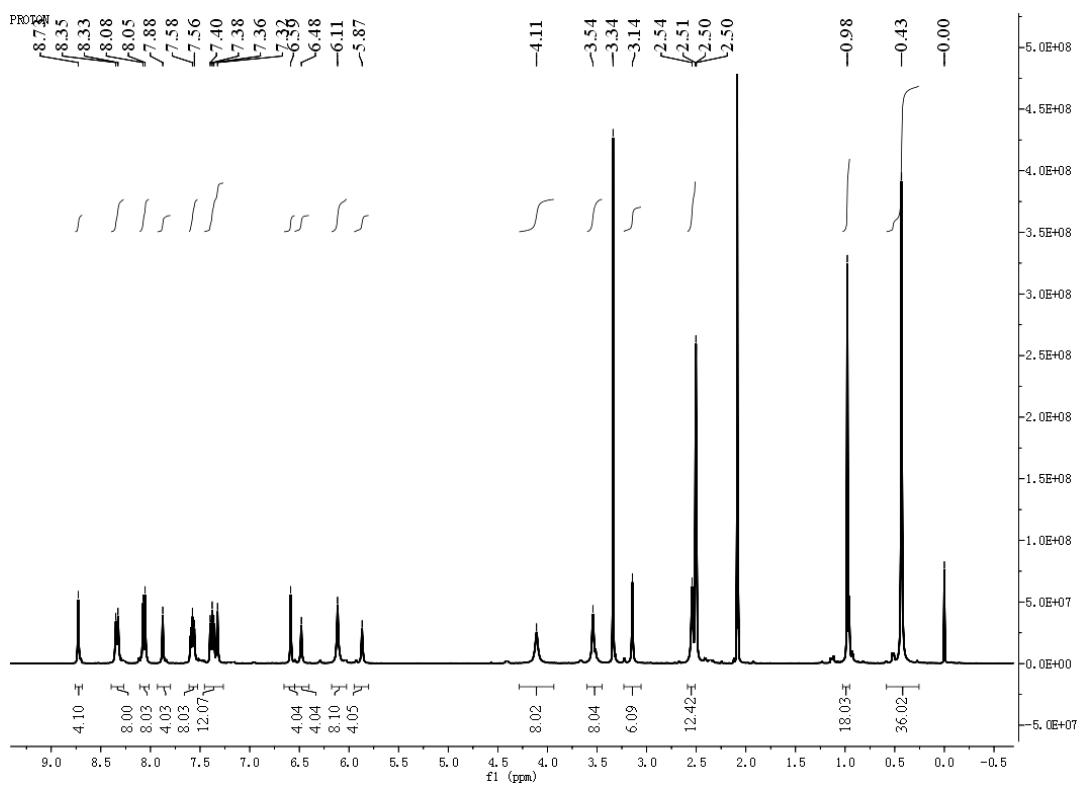

Figure S13.  $^1\text{H}$  NMR spectrum for complex **6f** (400 MHz,  $\text{DMSO-}d_6$ , 298 K).

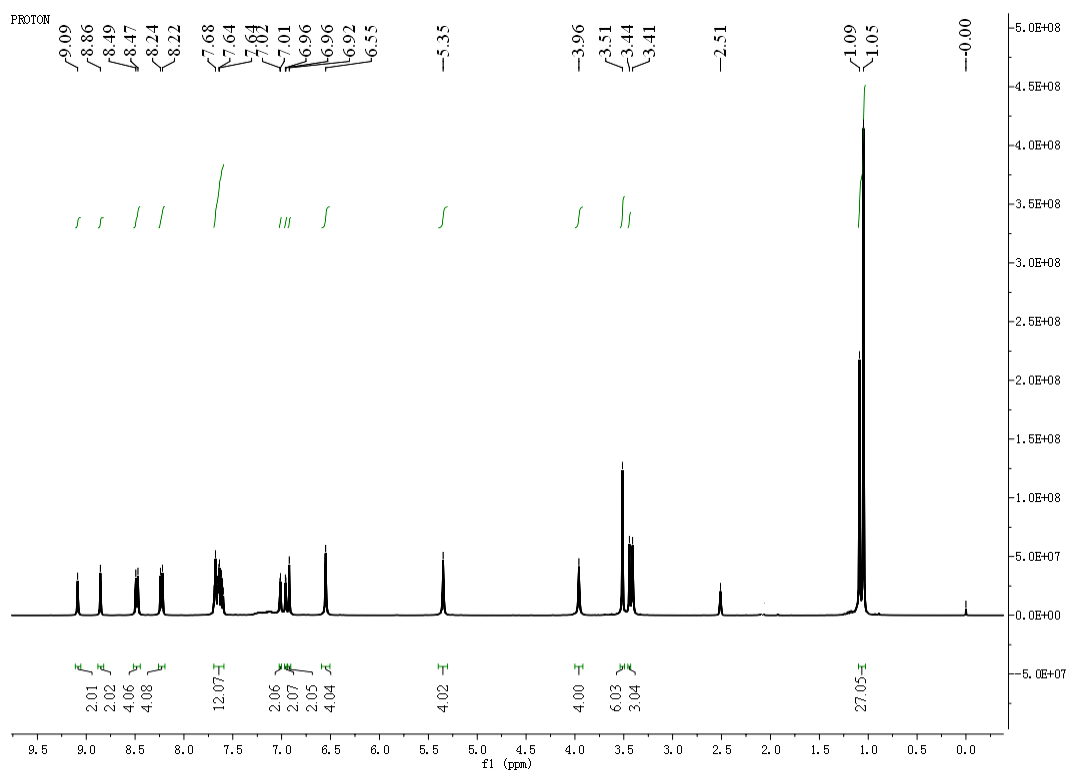

Figure S14.  $^1\text{H}$  NMR spectrum for ligand **5f** (400 MHz,  $\text{DMSO-}d_6$ , 298 K).

## DOSY Experiment of complex 6d

DOSY experiment was performed at 298 K on a Bruker AV400 spectrometer equipped with an Accustar z-axis gradient amplifier and an ATMA BBO probe with a z-axis gradient coil. Maximum gradient strength was 0.214 T/m. The standard Bruker pulse program, dstebpgp1s, employing a double stimulated echo sequence, bipolar gradient pulses for diffusion, and one spoil gradient was utilized. Bipolar rectangular gradients were used with total durations 0.5-3 ms. Gradient recovery delays were 0.5-1 ms. Diffusion times were between 500 and 2000 ms. The quasi-2D diffusion databases were phased and baseline corrected.

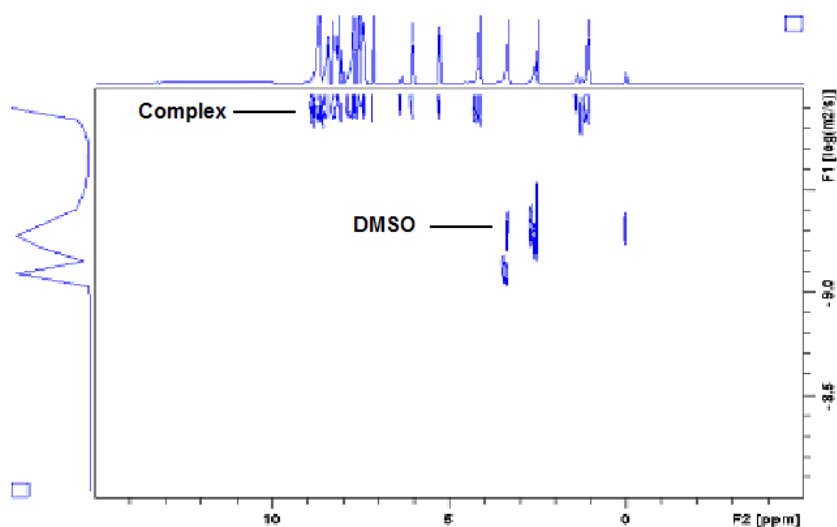

(a)

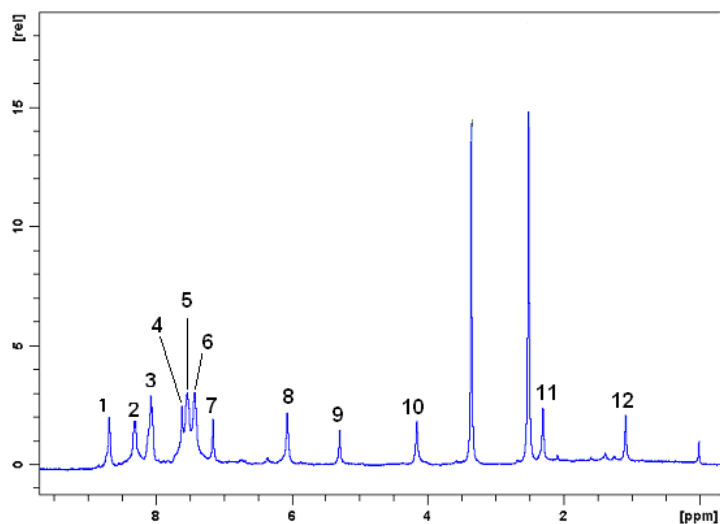

(b)

Figure S15. DOSY spectrum (a) and  $^1\text{H}$  NMR spectrum (b) (400 MHz, DMSO, 25 °C) of the reaction mixture, which was obtained after treatment ligand **5d** with  $\text{Ag}_2\text{O}$  at 50 °C in acetonitrile overnight, filtered through the Celite to exclude the excess  $\text{Ag}_2\text{O}$  and removing the acetonitrile.

Table S3. The fitting diffusion coefficients (Diff Con.) corresponding to the DOSY spectrum in Figure S15.

| Peak <sup>a</sup> | Peak Point (ppm) | Diff Con. ( $10^{-10}$ m <sup>2</sup> /s) |
|-------------------|------------------|-------------------------------------------|
| 1                 | 8.672            | 1.020                                     |
| 2                 | 8.311            | 1.008                                     |
| 3                 | 8.065            | 1.016                                     |
| 4                 | 7.605            | 1.037                                     |
| 5                 | 7.530            | 1.032                                     |
| 6                 | 7.417            | 1.018                                     |
| 7                 | 7.149            | 1.006                                     |
| 8                 | 6.060            | 1.016                                     |
| 9                 | 5.287            | 1.011                                     |
| 10                | 4.152            | 1.015                                     |
| 11                | 2.298            | 1.028                                     |
| 12                | 1.086            | 1.018                                     |
|                   |                  | Average D = 1.019                         |

<sup>a</sup> Some established characteristic <sup>1</sup>H NMR peak of complex **6d** in Figure S15b.

According to Stokes-Einstein equation:  $D_{\text{obs}} = k_{\text{B}}T/6\pi\eta R_{\text{h}}$ , where  $D_{\text{obs}}$  is the self-diffusion coefficients,  $k_{\text{B}}$  is the Boltzmann constant, T is the temperature and  $\eta$  is the viscosity of the solvent. The diffusion coefficients can give a rough size of the compound. The hydrodynamic radii ( $R_{\text{h}}$ ) were calculated to be 10.78 Å.<sup>1</sup>

The strengths of the others peaks are less than 10%, and they did not give an identical diffusion coefficient. Others byproduct particles such as metal-ligand complexes of  $[M_1L_1]$  or  $[M_3L_3]$  type can not be detected from the DOSY-NMR experiments.

## TGA, DSC and Variation temperature $^1\text{H}$ NMR of complex **6c**

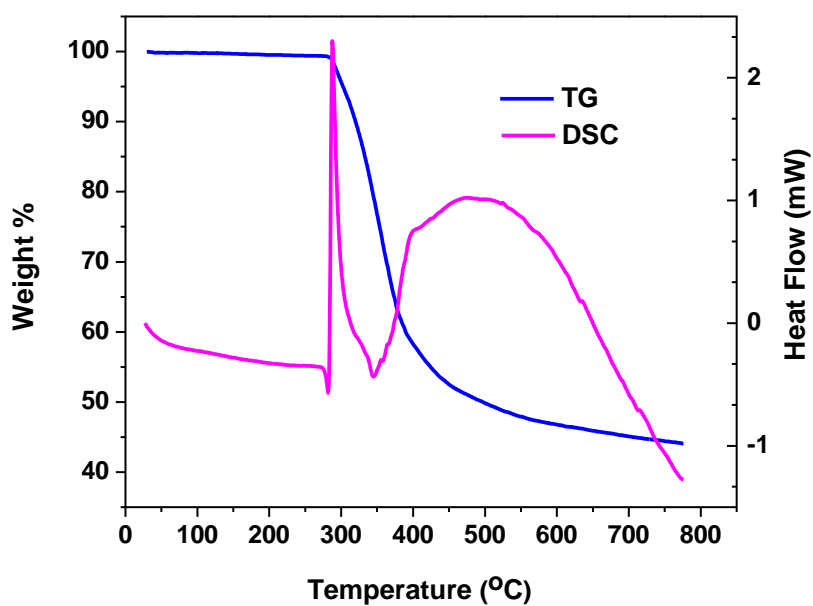

Figure S16. TGA and DSC curves of complex **6c**.

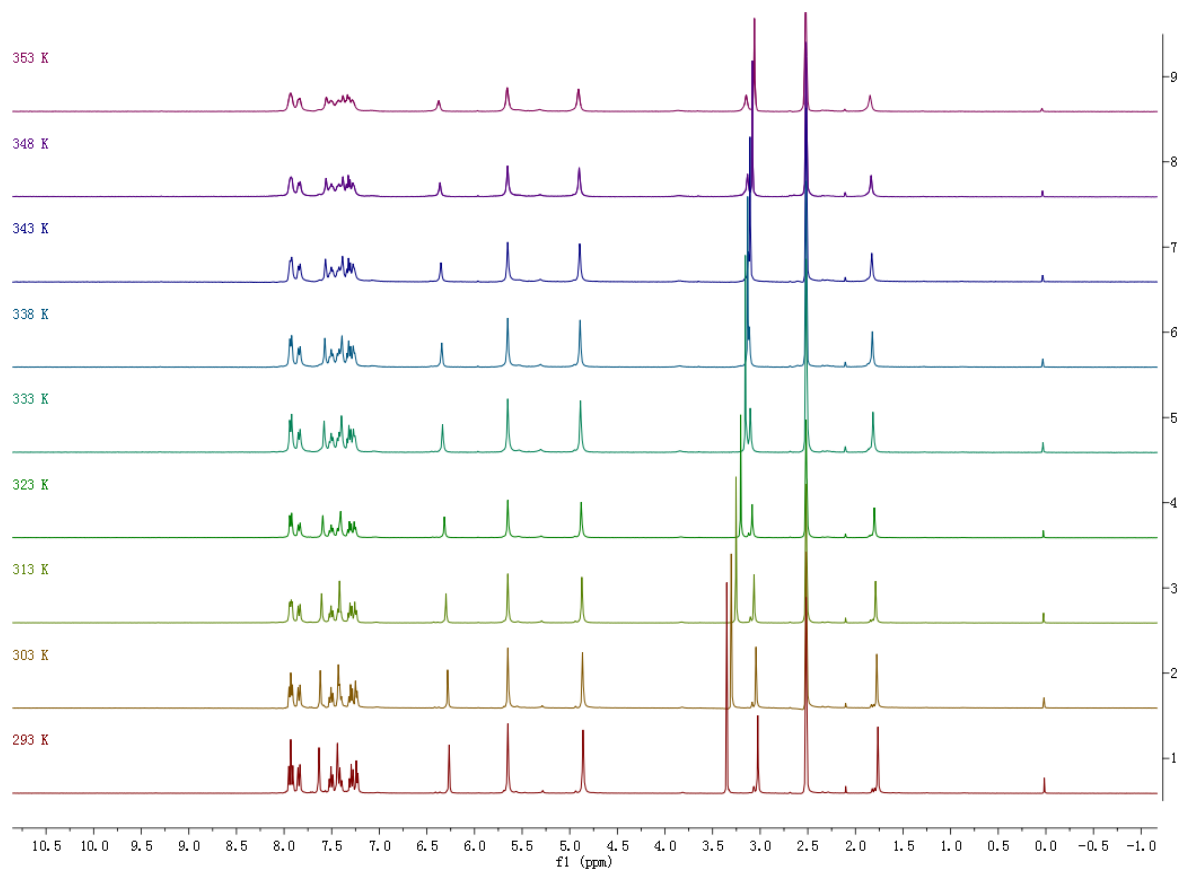

Figure S17. Variation temperature  $^1\text{H}$  NMR of complex **6c** (400 MHz, DMSO).

## Stern-Volmer plot of **6d** and **BQ**

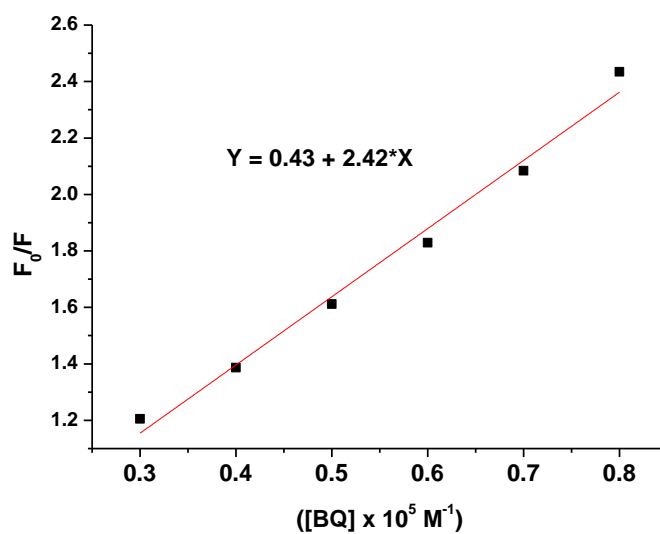

Figure S18. Stern-Volmer plot ( $\lambda_{\text{ex}} = 370 \text{ nm}$ ) of **6d** and **BQ** in acetonitrile. According to Stern-Volmer relation  $F_0/F = 1 + K_a [Q]$ ,  $[Q]$  = the concentration of the quencher (guest).  $K_a = 2.42 \times 10^5 \text{ M}^{-1}$ .

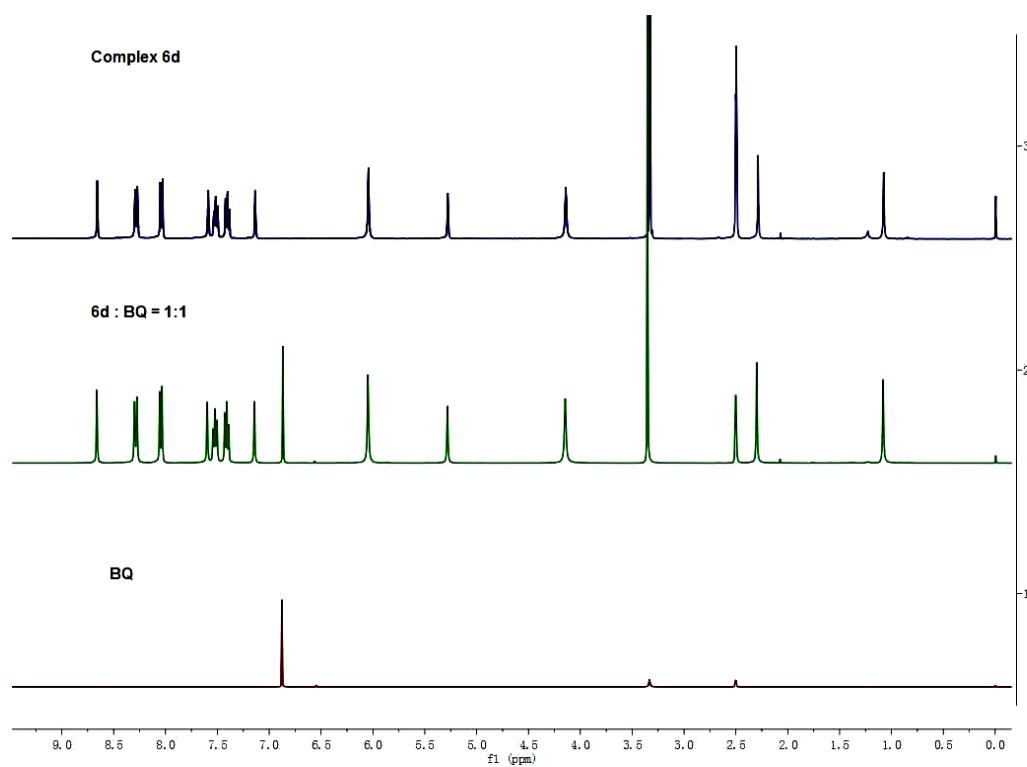

Figure S19.  $^1\text{H}$  NMR spectrum of complex **6d** and **BQ** (400 MHz,  $\text{DMSO}-d_6$ , 298 K).

## Job plot 1 of **6d/BQ** (done twice)

Table S4. Job plot 1 of **6d/BQ**<sup>a</sup>

| $x$ (mole fraction of <b>6d</b> ) | F (emission intensity) | $x \cdot F_0 - F$ |
|-----------------------------------|------------------------|-------------------|
| 1                                 | 448.90509 ( $F_0$ )    | 0                 |
| 0.9                               | 358.35602              | 45.65856          |
| 0.8                               | 276.68112              | 82.44295          |
| 0.7                               | 212.53974              | 101.69382         |
| 0.6                               | 148.35145              | 120.9916          |
| 0.5                               | 94.81054               | 129.642           |
| 0.4                               | 58.31838               | 121.24366         |
| 0.3                               | 30.13908               | 104.53245         |
| 0.2                               | 16.43443               | 73.34659          |
| 0.1                               | 10.80192               | 34.08859          |
| 0                                 | 1.11334                | -1.11334          |

<sup>a</sup> Job plot of **6d/BQ** in acetonitrile solution at 416 nm.

Table S5. Job plot 2 of **6d/BQ**<sup>a</sup>

| $x$ (mole fraction of <b>6d</b> ) | F (emission intensity) | $x \cdot F_0 - F$ |
|-----------------------------------|------------------------|-------------------|
| 1                                 | 453.73489 ( $F_0$ )    | 0                 |
| 0.9                               | 353.42602              | 54.93538          |
| 0.8                               | 274.51549              | 88.47242          |
| 0.7                               | 214.99348              | 102.62094         |
| 0.6                               | 148.4798               | 123.76113         |
| 0.5                               | 95.16784               | 131.69961         |
| 0.4                               | 57.94811               | 123.54585         |
| 0.3                               | 28.44882               | 107.67165         |
| 0.2                               | 18.96031               | 71.78667          |
| 0.1                               | 13.46204               | 31.91145          |
| 0                                 | 3.17212                | -3.17212          |

<sup>a</sup> Job plot of **6d/BQ** in acetonitrile solution at 416 nm.

## Fluorescence titration of complex **6e** with $C_{60}$

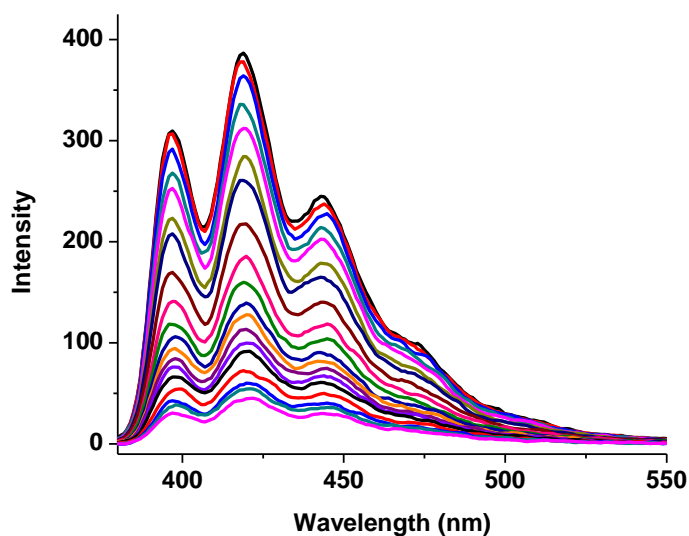

(a)

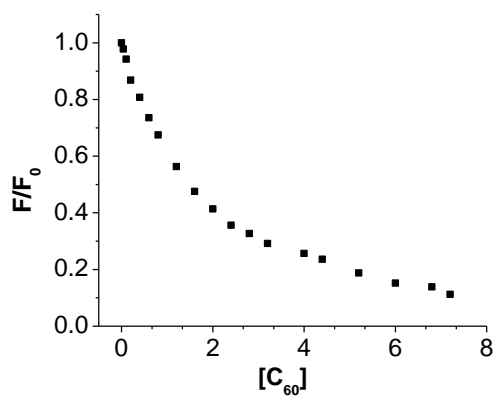

(b)

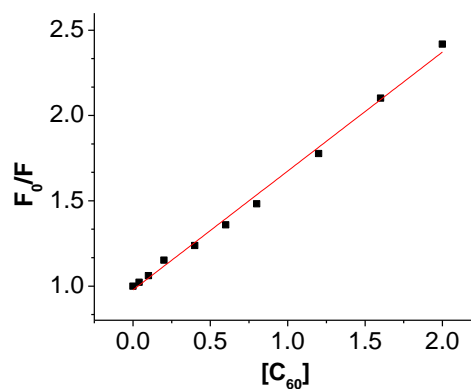

(c)

Figure S20 (a) Fluorescence spectra of complex **6e** ( $1.0 \times 10^{-5} \text{ mol L}^{-1}$ ) with  $C_{60}$  in acetonitrile solution ( $\lambda_{\text{ex}} = 370 \text{ nm}$ ) at room temperature. The concentrations of  $C_{60}$  for curves from top to bottom are 0.0, 0.04, 0.1, 0.2, 0.4, 0.6, 0.8, 1.2, 1.6, 2.0, 2.4, 2.8, 3.2, 4.0, 4.4, 5.2, 6.0, 6.8,  $7.2 \times 10^{-5} \text{ mol L}^{-1}$ . (b) Variation of fluorescence quenching  $F/F_0$  of **6e** with increasing  $C_{60}$  concentration. (c) Stern-Volmer plot of receptor **6e** quenched by  $C_{60}$ .

$$K_a = 6.97 \times 10^4 \text{ M}^{-1}, R^2 = 0.99457.$$



## Fluorescence titration of complex **6e** with $C_{70}$

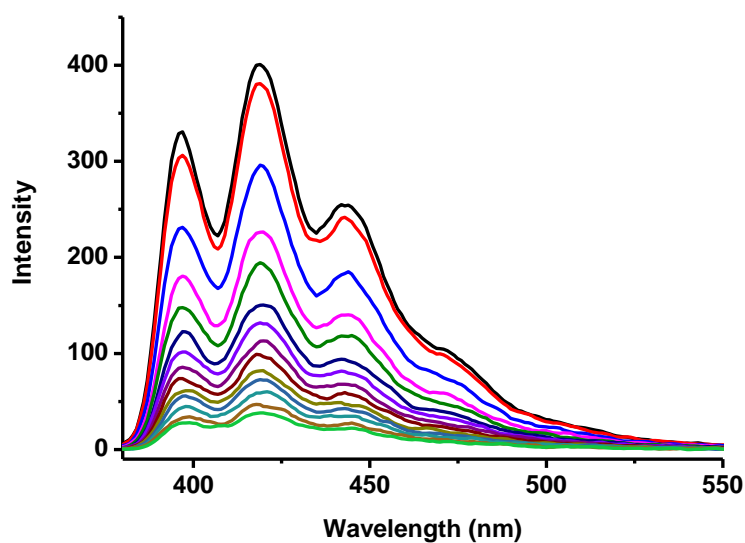

(a)

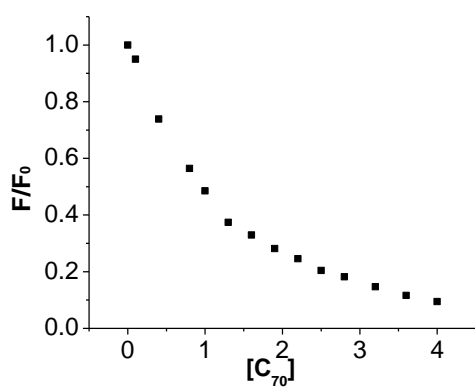

(b)

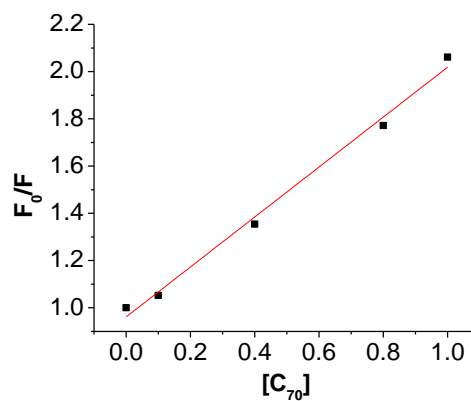

(c)

Figure S21 (a) Fluorescence spectra of complex **6e** (1.0 × 10<sup>-5</sup> mol L<sup>-1</sup>) with  $C_{70}$  in acetonitrile solution ( $\lambda_{\text{ex}} = 370$  nm) at room temperature. The concentrations of  $C_{70}$  for curves from top to bottom are 0.0, 0.1, 0.4, 0.8, 1.0, 1.3, 1.6, 1.9, 2.2, 2.5, 2.8, 3.2, 3.6, 4.0 × 10<sup>-5</sup> mol L<sup>-1</sup>. (b) Variation of fluorescence quenching  $F/F_0$  of **6e** with increasing  $C_{70}$  concentration. (c) Stern-Volmer plot of receptor **6e** quenched by  $C_{70}$ .

$$K_a = 1.057 \times 10^5 \text{ M}^{-1}, R^2 = 0.99107.$$

## Fluorescence titration of complex **6f** with C<sub>60</sub>

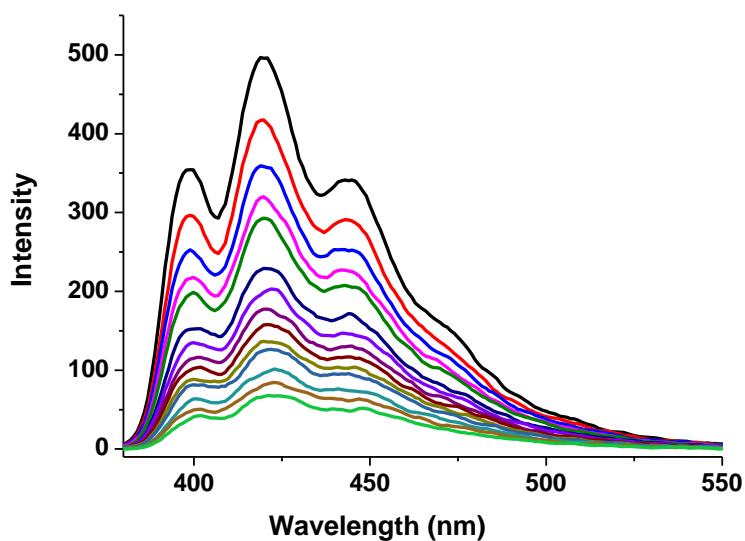

(a)

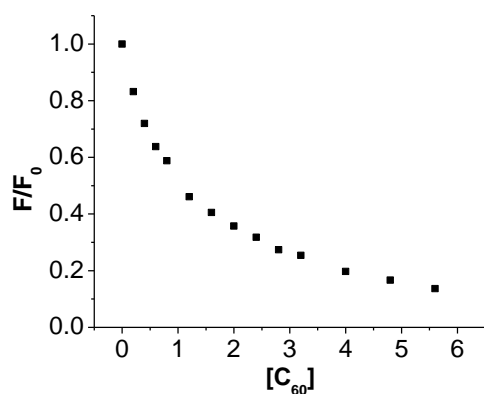

(b)

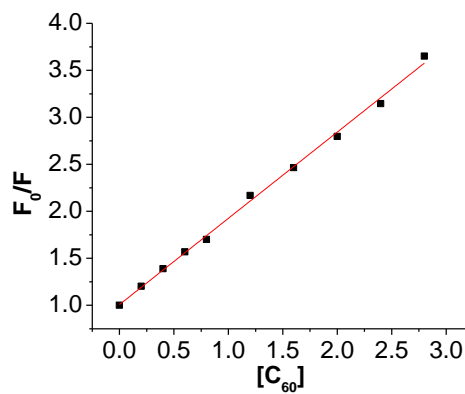

(c)

Figure S22 (a) Fluorescence spectra of complex **6f** ( $1.0 \times 10^{-5}$  mol L<sup>-1</sup>) with C<sub>60</sub> in acetonitrile solution ( $\lambda_{\text{ex}} = 370$  nm) at room temperature. The concentrations of C<sub>60</sub> for curves from top to bottom are 0.0, 0.2, 0.4, 0.6, 0.8, 1.2, 1.6, 2.0, 2.4, 2.8, 3.2, 4.0, 4.8,  $5.6 \times 10^{-5}$  mol L<sup>-1</sup>. (b) Variation of fluorescence quenching  $F/F_0$  of **6f** with increasing C<sub>60</sub> concentration. (c) Stern-Volmer plot of receptor **6f** quenched by C<sub>60</sub>.

$K_a = 9.17 \times 10^4 \text{ M}^{-1}$ ,  $R^2 = 0.99722$ .

## Fluorescence titration of complex **6f** with $C_{70}$

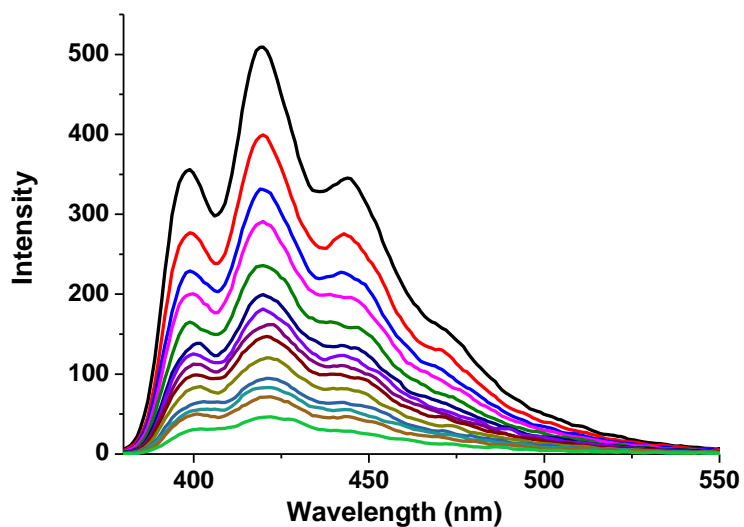

(a)

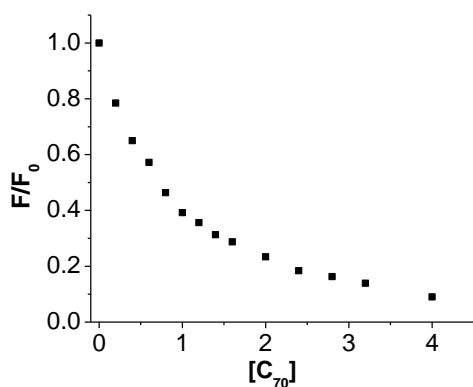

(b)

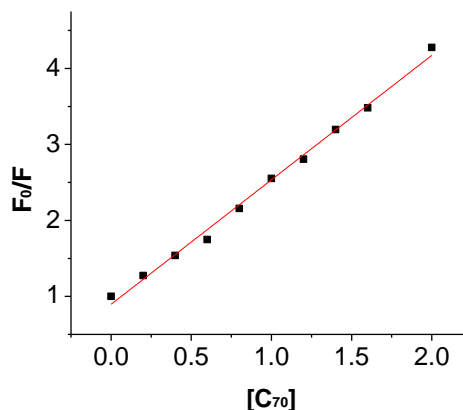

(c)

Figure S23 (a) Fluorescence spectra of complex **6f** ( $1.0 \times 10^{-5}$  mol L<sup>-1</sup>) with  $C_{70}$  in acetonitrile solution ( $\lambda_{\text{ex}} = 370$  nm) at room temperature. The concentrations of  $C_{70}$  for curves from top to bottom are 0.0, 0.2, 0.4, 0.6, 0.8, 1.0, 1.2, 1.4, 1.6, 2.0, 2.4, 2.8, 3.2,  $4.0 \times 10^{-5}$  mol L<sup>-1</sup>. (b) Variation of fluorescence quenching  $F/F_0$  of **6f** with increasing  $C_{70}$  concentration. (c) Stern-Volmer plot of receptor **6f** quenched by  $C_{70}$ .

$$K_a = 1.64 \times 10^5 \text{ M}^{-1}, R^2 = 0.99453.$$

## Reference

1. (a) R. S. Hickok, S. A. Wedge, A. L. Hansen, K. F. Morris, F. H. Billiot and I. M. Warner, *Magn. Reson. Chem.*, 2002, 40, 755-761; (b) R. Takano, K. Furumoto, K. Shiraki, N. Takata, Y. Hayashi, Y. Aso and S. Yamashita, *Pharmaceutical research*, 2008, 25, 2334-2344.
